# Supplementary material for: High electron affinity triggered by lithium coordination: quasi-chalcogen properties of Li2Sn8Be
Source: Royal Society of Chemistry journal article supplement (doi:10.1039/d2cp00967f), 2022-01-01
Supplement: d2cp00967f1.pdf [file d2cp00967f1.pdf]

## High electron affinity triggered by lithium coordination: quasi-chalcogen properties of $\text{Li}_2\text{Sn}_8\text{Be}$

Duomei Xue,<sup>a</sup> Zeren Chen,<sup>b</sup> Jingyao Liu,<sup>a</sup> Di Wu,<sup>a</sup> Zhiru Li<sup>a</sup>, Ying Li<sup>\*a</sup>

### This PDF file includes:

Supplementary Figure S1 to S5

Supplementary Tables S1 to S4

---

\* Corresponding author.

E-mail address: [liyingedu@jlu.edu.cn](mailto:liyingedu@jlu.edu.cn) (Y. Li).

<sup>a</sup>Laboratory of Theoretical and Computational Chemistry, Institute of Theoretical Chemistry, College of Chemistry, Jilin University, Changchun 130023, PR China

<sup>b</sup>School of Mechanical and Aerospace Engineering, Jilin University, Changchun 130025, PR China

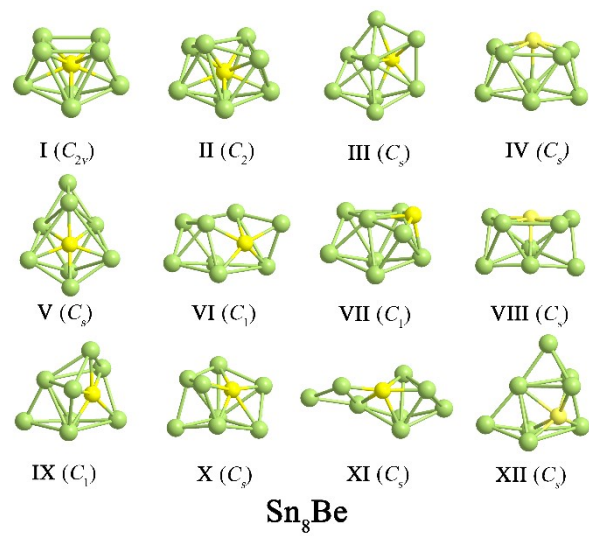

**Figure S1.** Optimized geometries of Sn<sub>8</sub>Be. Symmetry point groups are given in the parentheses.

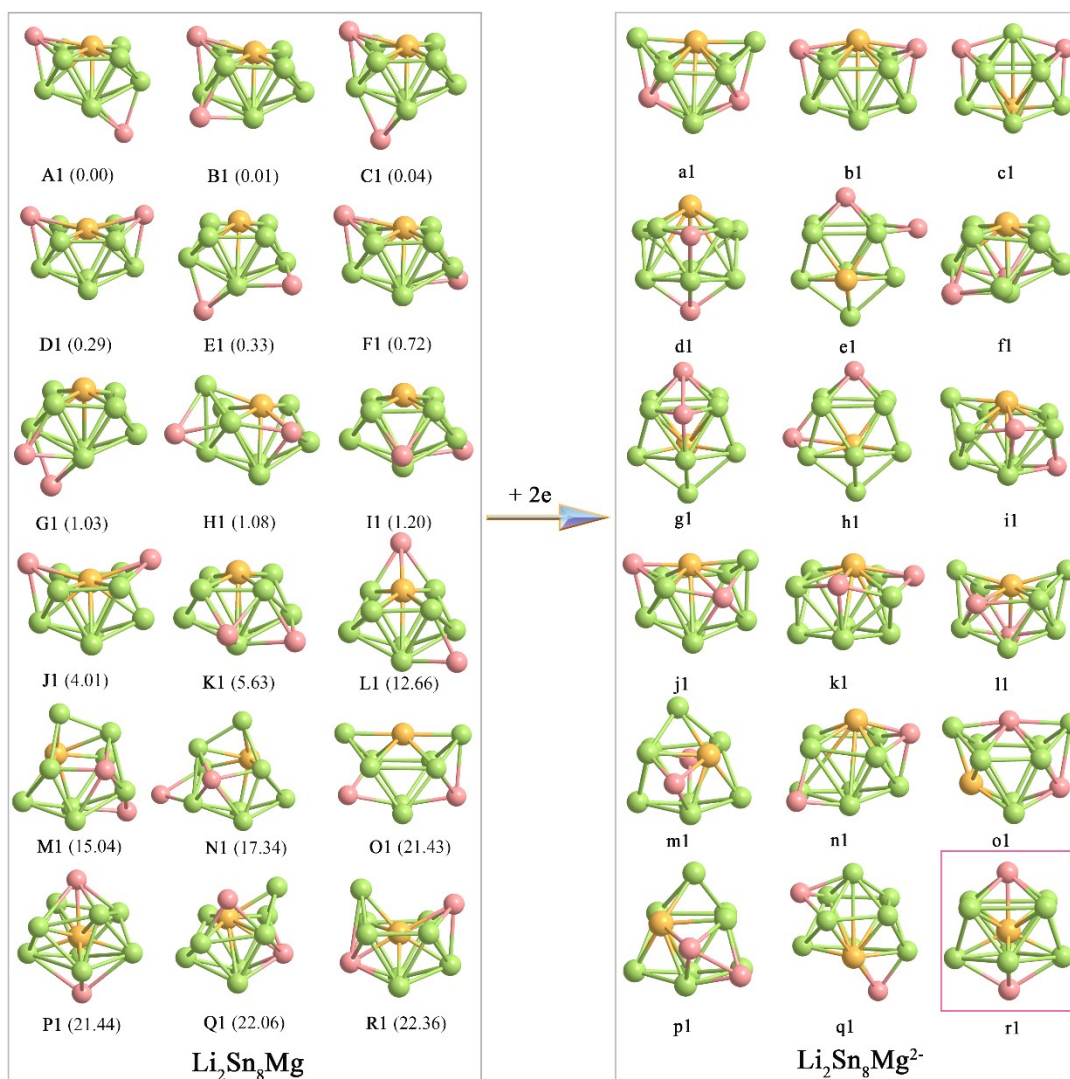

**Figure S2.** Low-lying isomers of  $\text{Li}_2\text{Sn}_8\text{Mg}$  and their corresponding  $\text{Li}_2\text{Sn}_8\text{Mg}^{2-}$  clusters. Relative energies (in  $\text{kcal mol}^{-1}$ ) are given in parentheses.

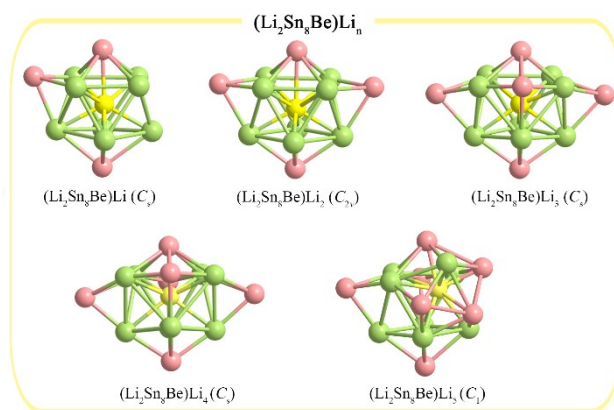

**Figure S3.** Optimized structures of  $(\text{Li}_2\text{Sn}_8\text{Be})\text{Li}_n$  ( $n = 1-5$ ) with point group symmetry in parentheses.

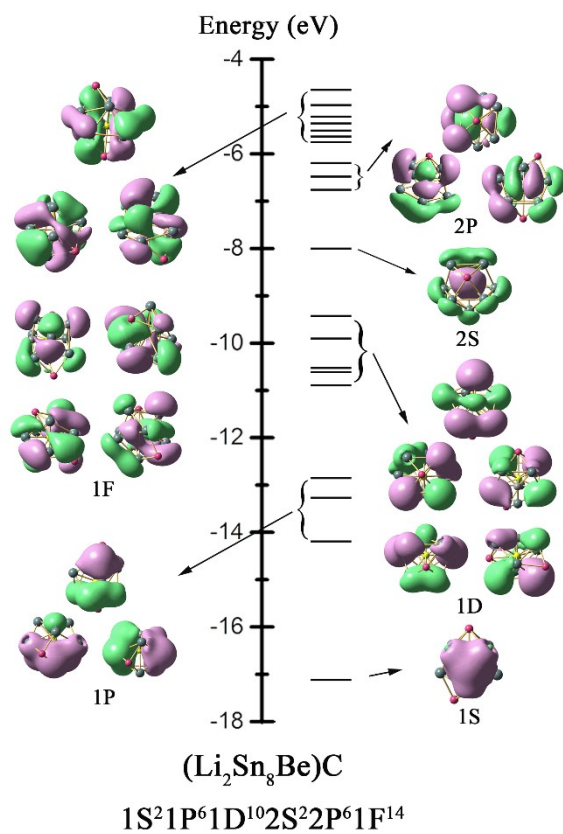

**Figure S4.** Electron-shell structure of the (Li<sub>2</sub>Sn<sub>8</sub>Be)C cluster.

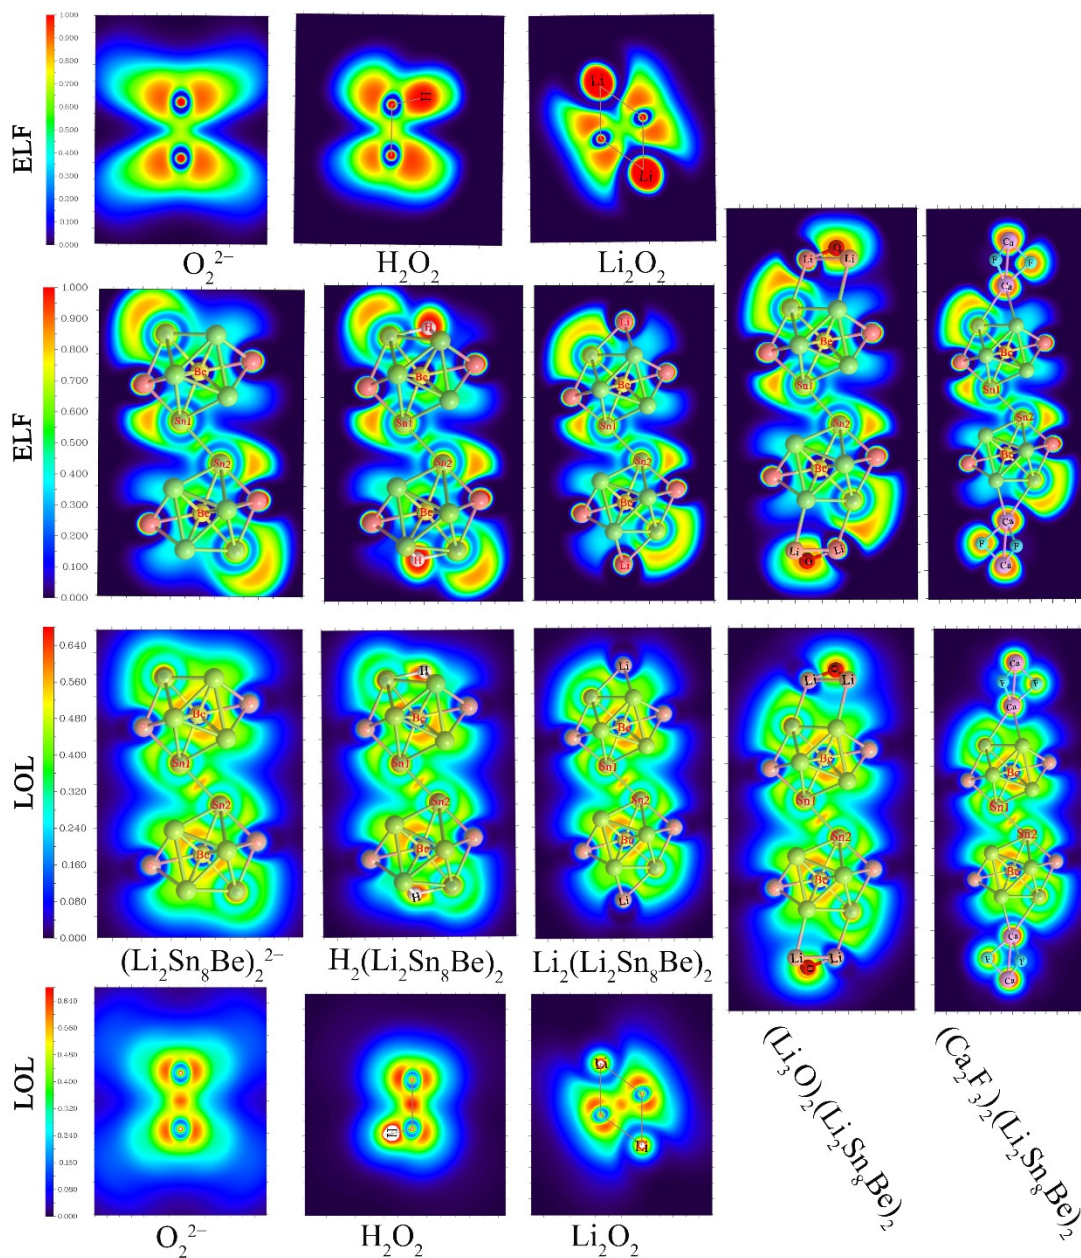

**Figure S5.** Cut-plane ELF and LOL maps of the  $(Li_2Sn_8Be)_2^{2-}$ ,  $H_2(Li_2Sn_8Be)_2$ ,  $Li_2(Li_2Sn_8Be)_2$ ,  $(Li_3O)_2(Li_2Sn_8Be)_2$ , and  $(Ca_2F_3)_2(Li_2Sn_8Be)_2$  compounds.

**Table S1.** Relative Energies ( $E_{\text{rel}}$ , in kcal mol<sup>-1</sup>), Symmetry Point Groups, Average Binding Energies ( $E_{\text{a}}$ , in eV), Number of Be-Sn Bonds (N), Average Be-Sn Bond Lengths ( $R_0$ , in Å), and HOMO – LUMO Gaps (in eV) of the Sn<sub>8</sub>Be isomers.

| Isomer      | $E_{\text{rel}}$ | symmetry | $E_{\text{a}}$ | gap  | N | $R_0$ |
|-------------|------------------|----------|----------------|------|---|-------|
| <b>I</b>    | 0.00             | $C_{2v}$ | 4.07           | 2.45 | 8 | 2.615 |
| <b>II</b>   | 0.95             | $C_2$    | 4.06           | 2.23 | 8 | 2.593 |
| <b>III</b>  | 22.22            | $C_s$    | 3.97           | 1.76 | 6 | 2.641 |
| <b>IV</b>   | 22.98            | $C_s$    | 3.96           | 1.98 | 5 | 2.604 |
| <b>V</b>    | 24.28            | $C_s$    | 3.95           | 1.69 | 7 | 2.641 |
| <b>VI</b>   | 29.57            | $C_1$    | 3.92           | 1.80 | 6 | 2.642 |
| <b>VII</b>  | 30.36            | $C_1$    | 3.92           | 1.87 | 4 | 2.510 |
| <b>VIII</b> | 30.81            | $C_s$    | 3.92           | 2.11 | 6 | 2.637 |
| <b>IX</b>   | 34.41            | $C_1$    | 3.90           | 1.98 | 6 | 2.617 |
| <b>X</b>    | 43.71            | $C_s$    | 3.86           | 1.74 | 6 | 2.687 |
| <b>XI</b>   | 44.49            | $C_s$    | 3.85           | 1.76 | 5 | 2.606 |
| <b>XII</b>  | 47.41            | $C_s$    | 3.84           | 1.76 | 6 | 2.623 |

**Table S2.** Symmetry Point Groups, and Important Geometrical Parameters (in Å), and Average Binding Energies (in eV) of the concerned  $[\text{Li}_2\text{Sn}_8]^{4-}$ ,  $\text{Li}_2\text{Sn}_8\text{Be}$ ,  $\text{Li}_2\text{Sn}_8\text{Be}^{2-}$ ,  $\text{Li}_2\text{Sn}_8\text{Mg}$ , and  $\text{Li}_2\text{Sn}_8\text{Mg}^{2-}$  Clusters.

|                                        | symmetry | $R_0$ | $w$   | $h$   | $E_a$ |
|----------------------------------------|----------|-------|-------|-------|-------|
| $[\text{Li}_2\text{Sn}_8]^{4-}$        | $D_{4d}$ | 2.653 | 4.703 | 2.455 |       |
| $\text{Li}_2\text{Sn}_8\text{Be}$      | $D_{4d}$ | 2.652 | 4.716 | 2.430 | 3.68  |
| $\text{Li}_2\text{Sn}_8\text{Be}^{2-}$ | $D_{4d}$ | 2.651 | 4.700 | 2.456 |       |
| $\text{Li}_2\text{Sn}_8\text{Mg}$      | $D_{4d}$ | 2.821 | 5.088 | 2.438 | 3.34  |
| $\text{Li}_2\text{Sn}_8\text{Mg}^{2-}$ | $D_{4d}$ | 2.813 | 5.049 | 2.482 |       |



**Table S3.** Average Binding Energies of Li atom ( $E_b$ , in eV), the Second Difference in Energy ( $\Delta^2E$ , in eV), Dissociation Energies ( $\Delta E$ , in eV), and HOMO–LUMO Gaps of the  $(\text{Li}_2\text{Sn}_8\text{Be})\text{Li}_n$  ( $n = 1-5$ ) Compounds.

| Isomers                                        | $E_b$ | $\Delta E$ | $\Delta^2E$ | Gap/eV |
|------------------------------------------------|-------|------------|-------------|--------|
| $(\text{Li}_2\text{Sn}_8\text{Be})\text{Li}$   | 2.328 | 2.328      | -0.937      | 1.40   |
| $(\text{Li}_2\text{Sn}_8\text{Be})\text{Li}_2$ | 2.527 | 2.726      | 2.014       | 2.53   |
| $(\text{Li}_2\text{Sn}_8\text{Be})\text{Li}_3$ | 1.922 | 0.713      | -0.585      | 1.54   |
| $(\text{Li}_2\text{Sn}_8\text{Be})\text{Li}_4$ | 1.766 | 1.297      | 0.167       | 1.53   |
| $(\text{Li}_2\text{Sn}_8\text{Be})\text{Li}_5$ | 1.639 | 1.130      |             | 1.47   |

**Table S4.** The binding energies ( $E_b^M$ ) and HOMO–LUMO gaps of the  $(\text{Li}_2\text{Sn}_8\text{Be})\text{M}$  ( $\text{M} = \text{Li}, \text{Be}, \text{B}, \text{C}, \text{N}, \text{O}, \text{and F}$ ) compounds.

| Species                                      | $E_b^M$ /kcal mol <sup>-1</sup> | Gap/ eV |
|----------------------------------------------|---------------------------------|---------|
| $(\text{Li}_2\text{Sn}_8\text{Be})\text{Li}$ | 53.7                            | 1.40    |
| $(\text{Li}_2\text{Sn}_8\text{Be})\text{Be}$ | 80.5                            | 2.10    |
| $(\text{Li}_2\text{Sn}_8\text{Be})\text{B}$  | 114.3                           | 1.87    |
| $(\text{Li}_2\text{Sn}_8\text{Be})\text{C}$  | 199.4                           | 2.21    |
| $(\text{Li}_2\text{Sn}_8\text{Be})\text{N}$  | 171.3                           | 1.52    |
| $(\text{Li}_2\text{Sn}_8\text{Be})\text{O}$  | 163.9                           | 1.91    |
| $(\text{Li}_2\text{Sn}_8\text{Be})\text{F}$  | 67.8                            | 1.60    |
